# Supplementary material for: Health Risk Assessment of Heavy Metals in Groundwater of Hainan Island Using the Monte Carlo Simulation Coupled with the APCS/MLR Model
Source: MDPI journal article supplement (doi:10.3390/ijerph19137827), 2022-06-26
Supplement: s1 [file s1]

# Supplementary Material

## Tables and Figures list

**Table S1.** Parameters used for calculation of water quality index (WQI).

**Table S2.** Exposure parameters used for health risk assessment calculations in this study.

**Table S3.** Values of reference dose (RfD) and carcinogenic slope factor (CSF) in different pathways.

**Table S4.** Uncertain concentration (ug/L) of heavy metals (HMs) in groundwater of Hainan Island.

**Table S5.** Principal component analysis of heavy metals in groundwater of Hainan Island.

**Table S6.** Summary statistics for 5th, 25th, 50th, 75th and 95th percentile non-carcinogenic and carcinogenic health risk based on Monte Carlo simulation using Crystal Ball (vs. 11.1.2.4).

**Table S7** Non-carcinogenic and carcinogenic health risk via different pathways.

**Figure S1.** Spatial distribution of the concentrations (ug/L) of groundwater heavy metals in study area.

**Figure S2.** Spatial distribution of (a) the water quality index (WQI) and (b) pollution evaluation index (PEI).

**Figure S3.** The country's key monitoring enterprises in Hainan province in 2015.

**Table S1.** Parameters used for calculation of water quality index (WQI).

| Parameters | wi       | Wi   | Si<br>(mg/L) |
|------------|----------|------|--------------|
| Cr         | 5.00 [1] | 0.16 | 0.05         |
| Mn         | 5.00 [1] | 0.16 | 0.10         |
| Fe         | 4.00 [2] | 0.13 | 0.30         |
| Cu         | 4.00 [2] | 0.13 | 1.00         |
| Zn         | 4.00 [1] | 0.13 | 1.00         |
| Cd         | 5.00 [1] | 0.16 | 0.01         |
| Pb         | 5.00 [1] | 0.16 | 0.01         |
| Total      | 32.00    | 1.00 |              |

**Table S2.** Exposure parameters used for health risk assessment calculations in this study.

| Parameters                               | Unit              | Probabilistic Distribution | Children                                                                        | Adult females                                         | Adult males                                           | References |
|------------------------------------------|-------------------|----------------------------|---------------------------------------------------------------------------------|-------------------------------------------------------|-------------------------------------------------------|------------|
| C <sub>w</sub>                           | mg L              | Normal                     | Measured                                                                        | Measured                                              | Measured                                              | This study |
| Intake rate<br>(IR)                      | L/day             | Normal                     | 50 <sup>th</sup> : 0.6,<br>95 <sup>th</sup> : 1.3                               | 50 <sup>th</sup> : 1.4,<br>95 <sup>th</sup> : 3.4     | 50 <sup>th</sup> : 1.6,<br>95 <sup>th</sup> : 4.0     | [3,4]      |
| Exposure frequency<br>(EF)               | day/year          | Triangular                 | 350 (180, 365)                                                                  | 350 (180, 365)                                        | 350 (180, 365)                                        | [5]        |
| Exposure duration<br>(ED)                | year              | Uniform                    | (0, 6)                                                                          | (0, 30)                                               | (0, 30)                                               | [6,7]      |
| Average body weight<br>(BW)              | kg                | Lognormal                  | (19.6, 1.96)                                                                    | (57.59, 8.03)                                         | (67.55, 8.72)                                         | [3,4]      |
| Average time of exposure<br>(AT)         | day               | point                      | 365 × ED (non-carcinogenic)<br>365 × 70 (carcinogenic)                          |                                                       |                                                       | [5,6]      |
| Exposed skin area<br>(SA)                | cm <sup>2</sup>   | Normal                     | 50 <sup>th</sup> : 8000,<br>95 <sup>th</sup> : 9500                             | 50 <sup>th</sup> : 15000,<br>95 <sup>th</sup> : 20000 | 50 <sup>th</sup> : 17000,<br>95 <sup>th</sup> : 20000 | [3,4]      |
| Skin permeability<br>coefficient<br>(PC) | cm/h              | point                      | 0.002 (Cr), 0.0001 (Mn), 0.001 (Fe and Cd), 0.0006 (Zn<br>and Cu), 0.00004 (Pb) |                                                       |                                                       | [8-10]     |
| Exposure time<br>(ET)                    | h/day             | Triangular                 | 0.20 (0.13, 0.33)                                                               | 0.20 (0.13, 0.33)                                     | 0.20 (0.13, 0.33)                                     | [11,12]    |
| Unit conversion factor<br>(CF)           | L/cm <sup>3</sup> | point                      | 0.001                                                                           | 0.001                                                 | 0.001                                                 | [13]       |
| Average Life (L)                         | a                 | Fixed value                | 70                                                                              | 70                                                    | 70                                                    | [10]       |

Notes: a1 and a2 in Log-Normal and Normal (a1, a2) defines the average value and the standard deviation for logarithmic normal and normal distribution; b1 and b2 in Uniform (b1, b2) defines the minimum and the maximum for uniform distribution; c1, c2 and c3 in in Triangular c1(c2, c3) defines the most likely value, the minimum and the maximum for triangular distribution.

**Table S3.** Values of reference dose (RfD) and carcinogenic slope factor (CSF) in different pathways.

| Parameters            | Cr                      | Mn                      | Fe                      | Cu                      | Zn                      | Cd                      | Pb                      |
|-----------------------|-------------------------|-------------------------|-------------------------|-------------------------|-------------------------|-------------------------|-------------------------|
| RfD <sub>oral</sub>   | 3.00×10 <sup>-3</sup> a | 1.40×10 <sup>-1</sup> b | 7.00×10 <sup>-1</sup> a | 4.00×10 <sup>-2</sup> a | 3.00×10 <sup>-1</sup> a | 5.00×10 <sup>-4</sup> a | 1.40×10 <sup>-3</sup> a |
| RfD <sub>dermal</sub> | 7.50×10 <sup>-5</sup> a | 8.00×10 <sup>-4</sup> b | 1.40×10 <sup>-1</sup> a | 8.00×10 <sup>-3</sup> a | 6.00×10 <sup>-2</sup> a | 2.50×10 <sup>-5</sup> a | 4.20×10 <sup>-4</sup> a |
| CSF <sub>oral</sub>   | 4.10×10 <sup>1</sup> b  | –                       | –                       | –                       | –                       | 3.8×10 <sup>-1</sup> b  | 8.50×10 <sup>-3</sup> a |
| CSF <sub>dermal</sub> | 5.00×10 <sup>-1</sup> b | –                       | –                       | –                       | –                       | 6.10 <sup>b</sup>       | n/a                     |

Note: n/a not available. a.[14]; b. [10]

**Table S4.** Uncertain concentration (ug/L) of heavy metals (HMs) in groundwater of Hainan Island.

| Parameters | Probabilistic distribution | Parameters (mean, SD) | Reference      |
|------------|----------------------------|-----------------------|----------------|
| Cr         | Lognormal                  | (6.52, 3.12)          | Metal specific |
| Mn         | Lognormal                  | (175.39, 572.48)      | Metal specific |
| Fe         | Lognormal                  | (36.57, 88.90)        | Metal specific |
| Cu         | Lognormal                  | (1.57, 1.46)          | Metal specific |
| Zn         | Lognormal                  | (22.94, 27.99)        | Metal specific |
| Cd         | Lognormal                  | (0.05, 0.07)          | Metal specific |
| Pb         | Lognormal                  | (2.17, 3.59)          | Metal specific |

**Table S5.** Principal component analysis of heavy metals in groundwater of Hainan Island.

| Component | Initial eigenvalues |               |              | Extraction sums of squared loadings |               |              | Rotation sums of squared loadings |               |              |
|-----------|---------------------|---------------|--------------|-------------------------------------|---------------|--------------|-----------------------------------|---------------|--------------|
|           | Total               | % of Variance | Cumulative % | Total                               | % of Variance | Cumulative % | Total                             | % of Variance | Cumulative % |
| 1         | 2.19                | 31.24         | 31.24        | 2.19                                | 31.24         | 31.24        | 1.82                              | 26.04         | 26.04        |
| 2         | 1.28                | 18.34         | 49.58        | 1.28                                | 18.34         | 49.58        | 1.49                              | 21.22         | 47.26        |
| 3         | 1.12                | 16.02         | 65.60        | 1.12                                | 16.02         | 65.60        | 1.28                              | 18.34         | 65.60        |
| 4         | 0.95                | 13.53         | 79.13        | —                                   | —             | —            | —                                 | —             | —            |
| 5         | 0.78                | 11.12         | 90.26        | —                                   | —             | —            | —                                 | —             | —            |
| 6         | 0.35                | 5.04          | 95.29        | —                                   | —             | —            | —                                 | —             | —            |
| 7         | 0.33                | 4.71          | 100.00       | —                                   | —             | —            | —                                 | —             | —            |

Note: “—” characteristic root component is not less than 1 and rotation.

**Table S6.** Summary statistics for 5<sup>th</sup>, 25<sup>th</sup>, 50<sup>th</sup>, 75<sup>th</sup> and 95<sup>th</sup> percentile non-carcinogenic and carcinogenic health risk based on Monte Carlo simulation using Crystal Ball (vs. 11.1.2.4).

| Risk | Metal | Adult males            |                        |                       |                       |                       | Adult females         |                       |                       |                       |                       | Children               |                        |                        |                        |                        |
|------|-------|------------------------|------------------------|-----------------------|-----------------------|-----------------------|-----------------------|-----------------------|-----------------------|-----------------------|-----------------------|------------------------|------------------------|------------------------|------------------------|------------------------|
|      |       | 5th                    | 25th                   | 50th                  | 75th                  | 95th                  | 5th                   | 25th                  | 50th                  | 75th                  | 95th                  | 5th                    | 25th                   | 50th                   | 75th                   | 95th                   |
| HQ   | Cr    | 2.56×10 <sup>-3</sup>  | 1.25×10 <sup>-2</sup>  | 2.45×10 <sup>-2</sup> | 3.72×10 <sup>-2</sup> | 5.27×10 <sup>-2</sup> | 3.43×10 <sup>-2</sup> | 4.36×10 <sup>-2</sup> | 5.09×10 <sup>-2</sup> | 5.90×10 <sup>-2</sup> | 7.12×10 <sup>-2</sup> | 4.35×10 <sup>-2</sup>  | 5.47×10 <sup>-2</sup>  | 6.32×10 <sup>-2</sup>  | 7.16×10 <sup>-2</sup>  | 8.41×10 <sup>-2</sup>  |
|      | Mn    | 1.30×10 <sup>-3</sup>  | 6.29×10 <sup>-3</sup>  | 1.24×10 <sup>-2</sup> | 1.88×10 <sup>-2</sup> | 2.67×10 <sup>-2</sup> | 1.74×10 <sup>-2</sup> | 2.22×10 <sup>-2</sup> | 2.60×10 <sup>-2</sup> | 3.01×10 <sup>-2</sup> | 3.65×10 <sup>-2</sup> | 2.14×10 <sup>-2</sup>  | 2.71×10 <sup>-2</sup>  | 3.14×10 <sup>-2</sup>  | 3.56×10 <sup>-2</sup>  | 4.23×10 <sup>-2</sup>  |
|      | Fe    | 5.26×10 <sup>-5</sup>  | 2.55×10 <sup>-4</sup>  | 5.01×10 <sup>-4</sup> | 7.61×10 <sup>-4</sup> | 1.09×10 <sup>-3</sup> | 7.07×10 <sup>-4</sup> | 9.00×10 <sup>-4</sup> | 1.06×10 <sup>-3</sup> | 1.23×10 <sup>-3</sup> | 1.49×10 <sup>-3</sup> | 8.62×10 <sup>-4</sup>  | 1.09×10 <sup>-3</sup>  | 1.27×10 <sup>-3</sup>  | 1.44×10 <sup>-3</sup>  | 1.71×10 <sup>-3</sup>  |
|      | Cu    | 3.93×10 <sup>-5</sup>  | 1.91×10 <sup>-4</sup>  | 3.74×10 <sup>-4</sup> | 5.69×10 <sup>-4</sup> | 8.12×10 <sup>-4</sup> | 5.29×10 <sup>-4</sup> | 6.73×10 <sup>-4</sup> | 7.90×10 <sup>-4</sup> | 9.17×10 <sup>-4</sup> | 1.11×10 <sup>-3</sup> | 6.44×10 <sup>-4</sup>  | 8.15×10 <sup>-4</sup>  | 9.47×10 <sup>-4</sup>  | 1.08×10 <sup>-3</sup>  | 1.28×10 <sup>-3</sup>  |
|      | Zn    | 7.65×10 <sup>-5</sup>  | 3.71×10 <sup>-4</sup>  | 7.29×10 <sup>-4</sup> | 1.11×10 <sup>-3</sup> | 1.58×10 <sup>-3</sup> | 1.03×10 <sup>-3</sup> | 1.31×10 <sup>-3</sup> | 1.54×10 <sup>-3</sup> | 1.79×10 <sup>-3</sup> | 2.17×10 <sup>-3</sup> | 1.25×10 <sup>-3</sup>  | 1.59×10 <sup>-3</sup>  | 1.84×10 <sup>-3</sup>  | 2.10×10 <sup>-3</sup>  | 2.49×10 <sup>-3</sup>  |
|      | Cd    | 1.04×10 <sup>-4</sup>  | 5.05×10 <sup>-4</sup>  | 9.94×10 <sup>-4</sup> | 1.51×10 <sup>-3</sup> | 2.14×10 <sup>-3</sup> | 1.40×10 <sup>-3</sup> | 1.78×10 <sup>-3</sup> | 2.08×10 <sup>-3</sup> | 2.42×10 <sup>-3</sup> | 2.93×10 <sup>-3</sup> | 1.72×10 <sup>-3</sup>  | 2.17×10 <sup>-3</sup>  | 2.52×10 <sup>-3</sup>  | 2.86×10 <sup>-3</sup>  | 3.40×10 <sup>-3</sup>  |
|      | Pb    | 1.54×10 <sup>-3</sup>  | 7.48×10 <sup>-3</sup>  | 1.47×10 <sup>-2</sup> | 2.23×10 <sup>-2</sup> | 3.19×10 <sup>-2</sup> | 2.07×10 <sup>-2</sup> | 2.64×10 <sup>-2</sup> | 3.10×10 <sup>-2</sup> | 3.60×10 <sup>-2</sup> | 4.37×10 <sup>-2</sup> | 2.52×10 <sup>-2</sup>  | 3.19×10 <sup>-2</sup>  | 3.71×10 <sup>-2</sup>  | 4.22×10 <sup>-2</sup>  | 5.02×10 <sup>-2</sup>  |
| HI   | Total | 5.65×10 <sup>-3</sup>  | 2.76×10 <sup>-2</sup>  | 5.42×10 <sup>-2</sup> | 8.23×10 <sup>-2</sup> | 1.17×10 <sup>-1</sup> | 7.61×10 <sup>-2</sup> | 9.68×10 <sup>-2</sup> | 1.13×10 <sup>-1</sup> | 1.31×10 <sup>-1</sup> | 1.59×10 <sup>-1</sup> | 9.46×10 <sup>-2</sup>  | 1.19×10 <sup>-1</sup>  | 1.38×10 <sup>-1</sup>  | 1.57×10 <sup>-1</sup>  | 1.86×10 <sup>-1</sup>  |
| ILCR | Cr    | 1.62×10 <sup>-6</sup>  | 7.89×10 <sup>-6</sup>  | 1.55×10 <sup>-5</sup> | 2.36×10 <sup>-5</sup> | 3.36×10 <sup>-5</sup> | 2.19×10 <sup>-5</sup> | 2.79×10 <sup>-5</sup> | 3.27×10 <sup>-5</sup> | 3.80×10 <sup>-5</sup> | 4.61×10 <sup>-5</sup> | 5.32×10 <sup>-6</sup>  | 6.74×10 <sup>-6</sup>  | 7.83×10 <sup>-6</sup>  | 8.90×10 <sup>-6</sup>  | 1.06×10 <sup>-5</sup>  |
|      | Cd    | 1.20×10 <sup>-10</sup> | 5.83×10 <sup>-10</sup> | 1.14×10 <sup>-9</sup> | 1.74×10 <sup>-9</sup> | 2.48×10 <sup>-9</sup> | 1.61×10 <sup>-9</sup> | 2.05×10 <sup>-9</sup> | 2.41×10 <sup>-9</sup> | 2.79×10 <sup>-9</sup> | 3.38×10 <sup>-9</sup> | 3.96×10 <sup>-10</sup> | 5.00×10 <sup>-10</sup> | 5.81×10 <sup>-10</sup> | 6.59×10 <sup>-10</sup> | 7.83×10 <sup>-10</sup> |
|      | Pb    | 1.12×10 <sup>-10</sup> | 5.44×10 <sup>-10</sup> | 1.07×10 <sup>-9</sup> | 1.63×10 <sup>-9</sup> | 2.32×10 <sup>-9</sup> | 1.51×10 <sup>-9</sup> | 1.92×10 <sup>-9</sup> | 2.26×10 <sup>-9</sup> | 2.62×10 <sup>-9</sup> | 3.18×10 <sup>-9</sup> | 3.67×10 <sup>-10</sup> | 4.65×10 <sup>-10</sup> | 5.40×10 <sup>-10</sup> | 6.14×10 <sup>-10</sup> | 7.31×10 <sup>-10</sup> |
| TCR  | Total | 1.62×10 <sup>-6</sup>  | 7.89×10 <sup>-6</sup>  | 1.55×10 <sup>-5</sup> | 2.36×10 <sup>-5</sup> | 3.36×10 <sup>-5</sup> | 2.19×10 <sup>-5</sup> | 2.79×10 <sup>-5</sup> | 3.27×10 <sup>-5</sup> | 3.80×10 <sup>-5</sup> | 4.61×10 <sup>-5</sup> | 5.32×10 <sup>-6</sup>  | 6.74×10 <sup>-6</sup>  | 7.83×10 <sup>-6</sup>  | 8.90×10 <sup>-6</sup>  | 1.06×10 <sup>-5</sup>  |

**Table S7.** Non-carcinogenic and carcinogenic health risk via different pathways.

| Risk                  | Metal | Adult males           |                        | Adult males           |                        | Children               |                        |
|-----------------------|-------|-----------------------|------------------------|-----------------------|------------------------|------------------------|------------------------|
|                       |       | Ingestion             | Dermal contact         | Ingestion             | Dermal contact         | Ingestion              | Dermal contact         |
| Non-carcinogenic risk | Cr    | 2.16×10 <sup>-2</sup> | 4.02×10 <sup>-3</sup>  | 4.41×10 <sup>-2</sup> | 7.56×10 <sup>-3</sup>  | 5.22×10 <sup>-2</sup>  | 1.11×10 <sup>-2</sup>  |
|                       | Mn    | 1.24×10 <sup>-2</sup> | 5.06×10 <sup>-4</sup>  | 2.54×10 <sup>-2</sup> | 9.53×10 <sup>-4</sup>  | 3.01×10 <sup>-2</sup>  | 1.41×10 <sup>-3</sup>  |
|                       | Fe    | 5.18×10 <sup>-4</sup> | 6.03×10 <sup>-6</sup>  | 1.06×10 <sup>-3</sup> | 1.14×10 <sup>-5</sup>  | 1.26×10 <sup>-3</sup>  | 1.67×10 <sup>-5</sup>  |
|                       | Cu    | 3.89×10 <sup>-4</sup> | 2.72×10 <sup>-6</sup>  | 7.97×10 <sup>-4</sup> | 5.12×10 <sup>-6</sup>  | 9.43×10 <sup>-4</sup>  | 7.55×10 <sup>-6</sup>  |
|                       | Zn    | 7.59×10 <sup>-4</sup> | 5.30×10 <sup>-6</sup>  | 1.55×10 <sup>-3</sup> | 9.97×10 <sup>-6</sup>  | 1.84×10 <sup>-3</sup>  | 1.47×10 <sup>-5</sup>  |
|                       | Cd    | 9.92×10 <sup>-4</sup> | 4.62×10 <sup>-5</sup>  | 2.03×10 <sup>-3</sup> | 8.69×10 <sup>-5</sup>  | 2.40×10 <sup>-3</sup>  | 1.28×10 <sup>-4</sup>  |
|                       | Pb    | 1.54×10 <sup>-2</sup> | 4.77×10 <sup>-6</sup>  | 3.15×10 <sup>-2</sup> | 8.98×10 <sup>-6</sup>  | 10                     | 1.32×10 <sup>-5</sup>  |
|                       | HI    | 5.20×10 <sup>-2</sup> | 4.59×10 <sup>-3</sup>  | 1.06×10 <sup>-1</sup> | 8.63×10 <sup>-3</sup>  | 1.26×10 <sup>-1</sup>  | 1.27×10 <sup>-2</sup>  |
| Carcinogenic risk     | Cr    | 1.62×10 <sup>-5</sup> | 9.22×10 <sup>-10</sup> | 3.32×10 <sup>-5</sup> | 1.73×10 <sup>-9</sup>  | 7.87×10 <sup>-6</sup>  | 5.12×10 <sup>-10</sup> |
|                       | Cd    | 1.15×10 <sup>-9</sup> | 4.31×10 <sup>-11</sup> | 2.36×10 <sup>-9</sup> | 8.12×10 <sup>-11</sup> | 5.59×10 <sup>-10</sup> | 2.39×10 <sup>-11</sup> |
|                       | Pb    | 1.12×10 <sup>-9</sup> | -                      | 2.29×10 <sup>-9</sup> | -                      | 5.43×10 <sup>-10</sup> | -                      |
|                       | TCR   | 1.62×10 <sup>-5</sup> | 9.65×10 <sup>-10</sup> | 3.32×10 <sup>-5</sup> | 1.82×10 <sup>-9</sup>  | 7.87×10 <sup>-6</sup>  | 5.36×10 <sup>-10</sup> |



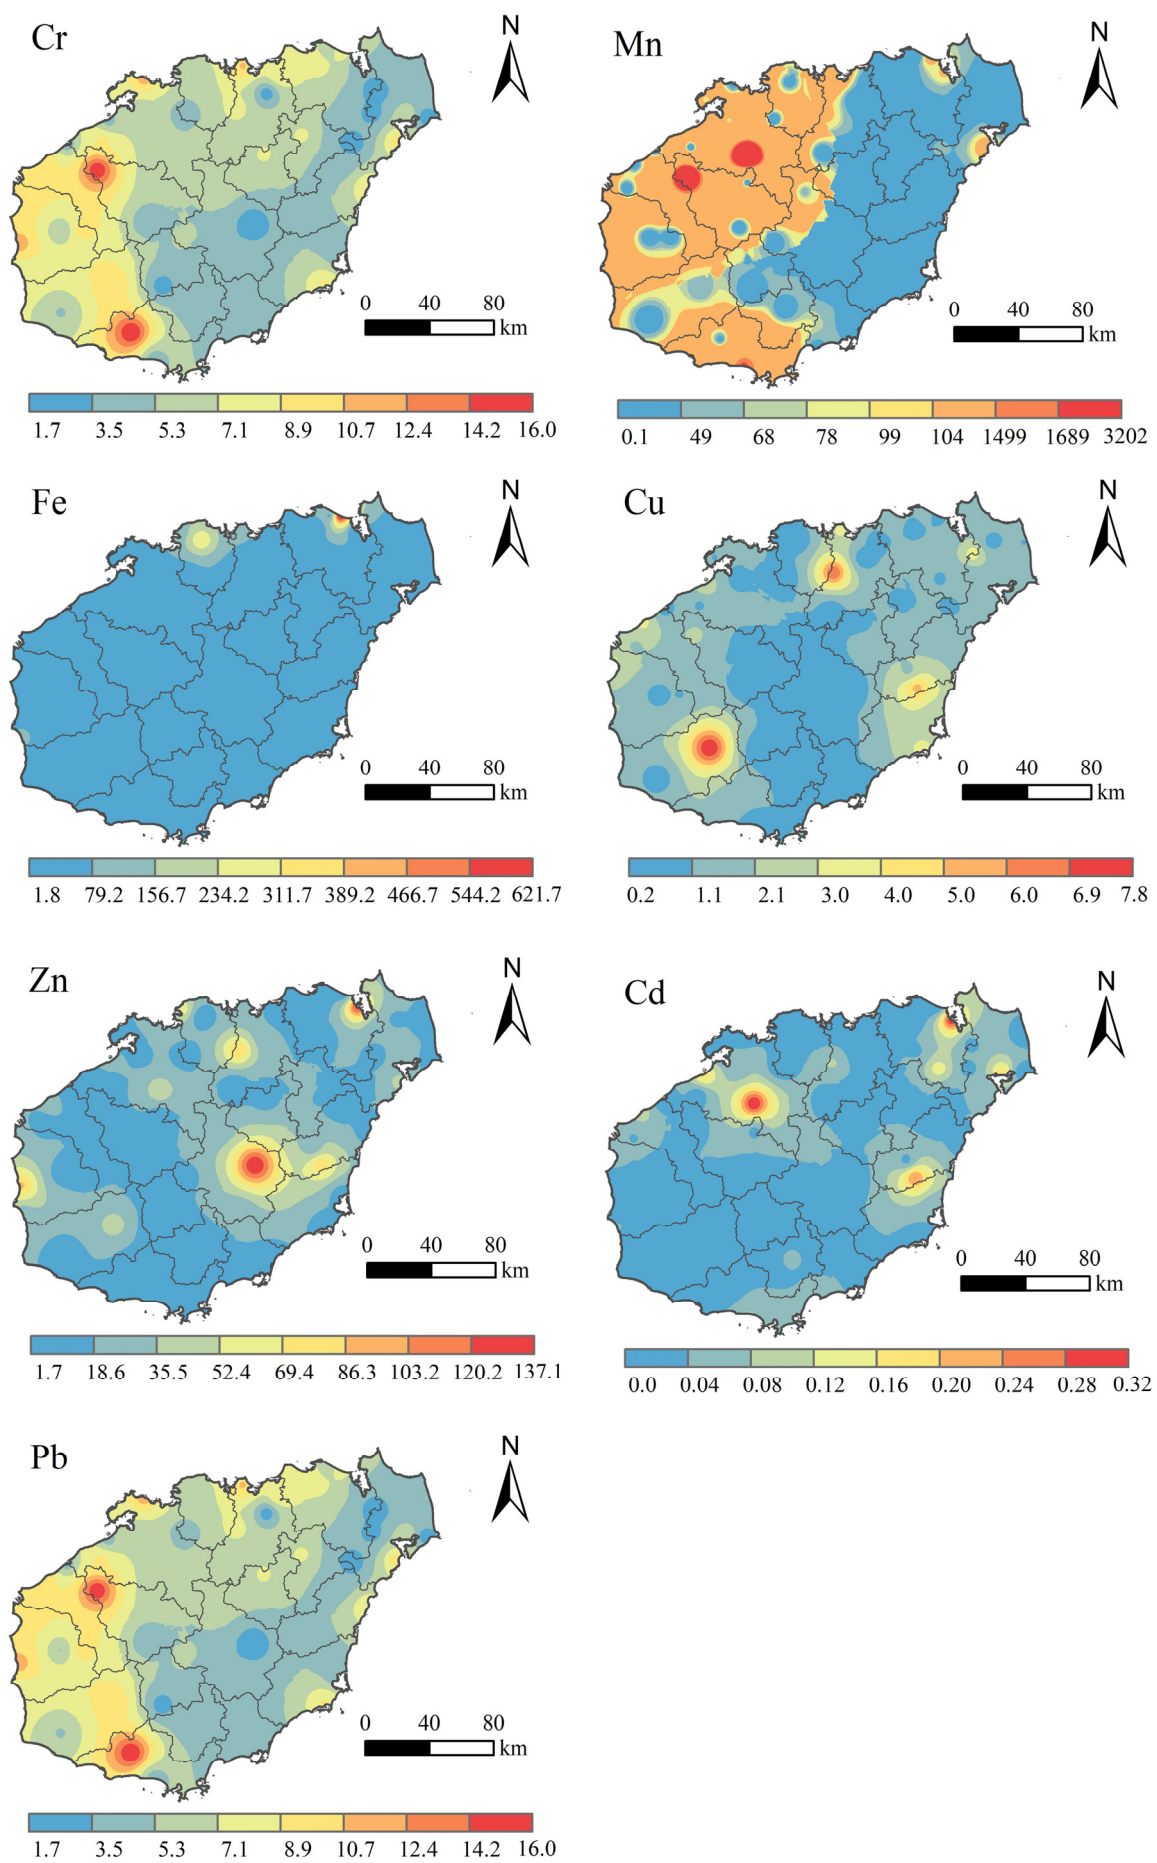

**Figure S1.** Spatial distribution of the concentrations (ug/L) of heavy metals in groundwater in study area.

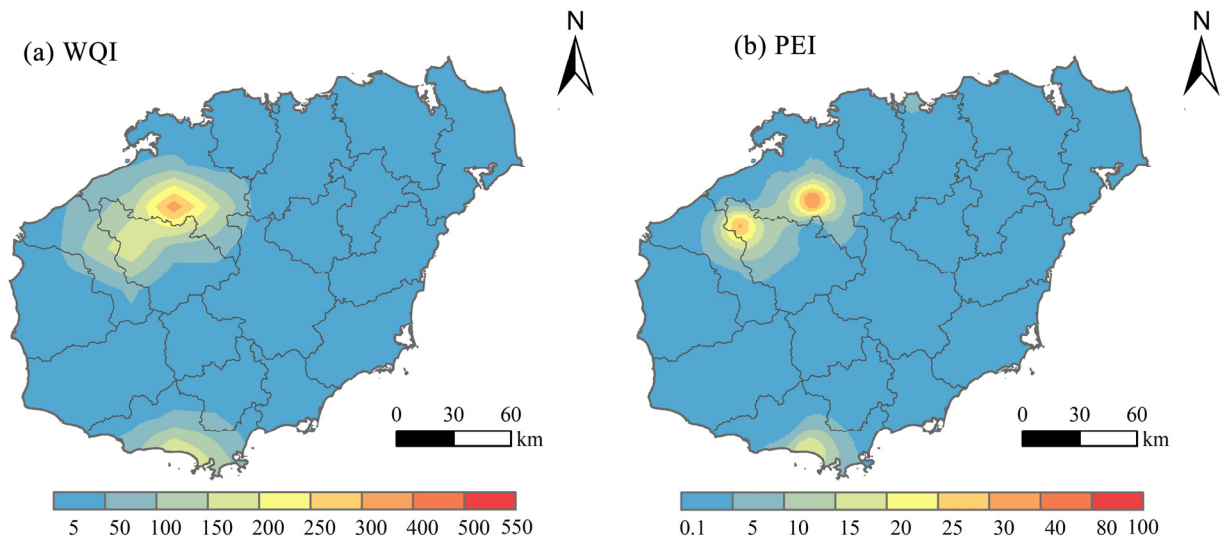

**Figure S2.** Spatial distribution of (a) the water quality index (WQI) and (b) pollution evaluation index (PEI).

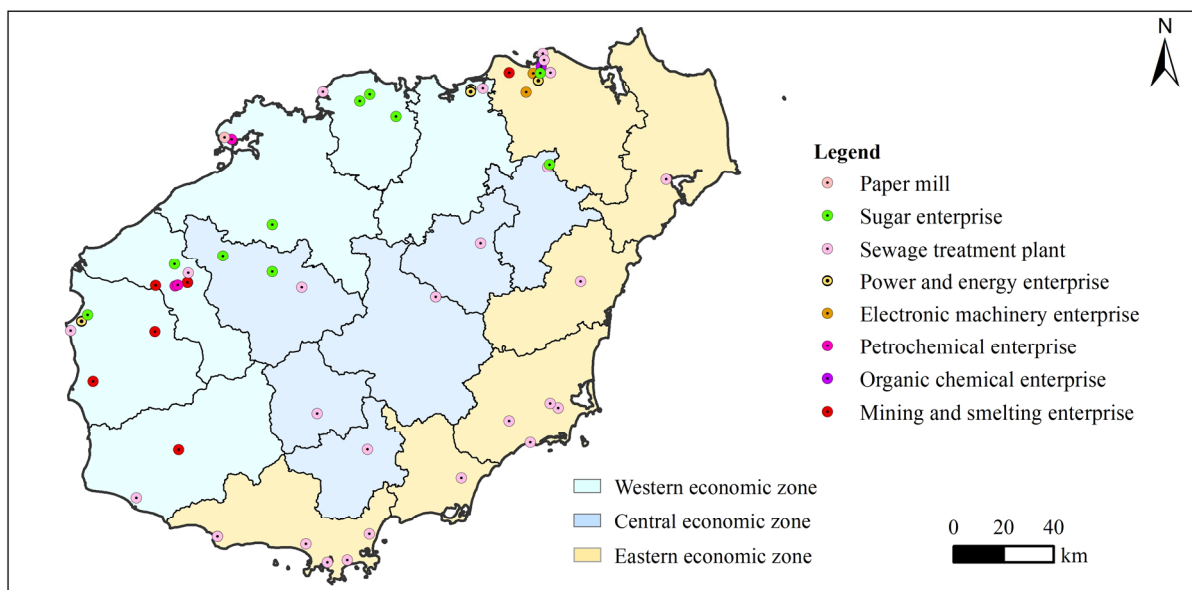

Figure S3. The country's key monitoring enterprises in Hainan province in 2015.

## References

1. Githaiga, K.B.; Njuguna, S.M.; Gituru, R.W.; Yan, X. Water quality assessment, multivariate analysis and human health risks of heavy metals in eight major lakes in Kenya. *J. Environ. Manag.* **2021**, *297*, 113410. <https://doi.org/10.1016/j.jenvman.2021.113410>.
2. Egbueri, J.C. Heavy metals pollution source identification and probabilistic health Risk Assessment of Shallow Groundwater in Onitsha, Nigeria. *Anal. Lett.* **2020**, *53*, 1620–1638. <https://doi.org/10.1080/00032719.2020.1712606>.
3. MEP. *Highlights of the Chinese Exposure Factors Handbook (Adults)*; China Environmental Science Press: Beijing, China, 2014. (In Chinese)
4. MEP. *Highlights of the Chinese Exposure Factors Handbook (Children)*; China Environmental Science Press: Beijing, China, 2016. (In Chinese)
5. Huang, J.; Wu, Y.; Sun, J.; Li, X.; Geng, X.; Zhao, M.; Sun, T.; Fan, Z. Health risk assessment of heavy metal(loid)s in park soils of the largest megacity in China by using Monte Carlo simulation coupled with Positive matrix factorization model. *J. Hazard. Mater.* **2021**, *415*, 125629. <https://doi.org/10.1016/j.jhazmat.2021.125629>
6. Ngo, H.T.T.; Watchalayann, P.; Nguyen, D.B.; Doan, H.N.; Liang, L. Environmental health risk assessment of heavy metal exposure among children living in an informal e-waste processing village in Viet Na. *Sci. Total Environ.* **2021**, *763*, 142982. <https://doi.org/10.1016/j.scitotenv.2020.142982>
7. Zeng, G.; Liang, J.; Guo, S.; Shi, L.; Xiang, L.; Li, X.; Du, C. Spatial analysis of human health risk associated with ingesting manganese in Huangxing Town, Middle China. *Chemosphere* **2009**, *77*, 368–375. <https://doi.org/10.1016/j.chemosphere.2009.07.020>
8. USEPA. Risk assessment guidance for superfund. In *Part A: Human Health Evaluation Manual; Part E, Supplemental Guidance for Dermal Risk Assessment, Vol. 1*; U.S. Environment Protection Agency: Washington, DC, USA, 2011.
9. Duan, X. *Research Methods of Exposure Factors and Its Application in Environmental Health Risk Assessment*; Science Press: Beijing, China, 2012.
10. Jiang, C.; Zhao, Q.; Zheng, L.; Chen, X.; Li, C.; Ren, M. Distribution, source and health risk assessment based on the Monte Carlo method of heavy metals in shallow groundwater in an area affected by mining activities, China. *Ecotox. Environ. Safe.* **2021**, *224*, 112679. <https://doi.org/10.1016/j.ecoenv.2021.112679>.
11. Saha, N.; Rahman, M.S.; Ahmed, M.B.; Zhou, J.L.; Ngo, H.H.; Guo, W. Industrial metal pollution in water and probabilistic assessment of human health risk. *J. Environ. Manag.* **2017**, *185*, 70–78. <https://doi.org/10.1016/j.jenvman.2016.10.023>.
12. USEPA. Quantitative Uncertainty Analysis of Superfund Residential Risk Pathway Models for Soil and Groundwater: White Paper; US Environmental Protection Agency: Washington, DC, USA, 1996.
13. Nilkarnjanakul, W.; Watchalayann, P.; Chotpantarat, S. Spatial distribution and health risk assessment of As and Pb contamination in the groundwater of Rayong Province, Thailand. *Environ. Res.* **2022**, *204*, 111838. <https://doi.org/10.1016/j.envres.2021.111838>.
14. Panda, G.; Pobi, K.K.; Gangopadhyay, S.; Gope, M.; Rai, A.K.; Nayek, S. Contamination level, source identification and health risk evaluation of potentially toxic elements (PTEs) in groundwater of an industrial city in eastern India. *Environ. Geochem. Health* **2021**, 1–25. <https://doi.org/10.1007/s10653-021-01071-1>.
